# Supplementary material
Source: HighWire-hosted journal article supplement (https://www.cmaj.ca/highwire/filestream/58477/field_highwire_adjunct_files/2/249-app2.pdf)
Supplement: 249-app2.pdf [file 249-app2.pdf]

## Appendix 2

### Procedure for donning and removing the powered air-purifying respirator (PAPR) system

#### Entry preparations

Check belt unit and hood to ensure proper assembly and function.

Remove jewelry, pagers, nametags and stethoscopes.

Make sure hair is contained (tied back).

Wear a scrub shirt and pants only (no T-shirts underneath); tuck long laces into shoes.

Cleanse hands with alcohol rinse.

Put on new N95 mask.

Put on bouffant hair cover.

Put on goggles.

Put on high-top shoe covers (to the knee).

Put on clean surgical gloves.

Put on clean body suit, zipped up all the way, with neck covered and hood up.

Put on 2nd pair of high-top shoe covers.

Put on 2nd pair of gloves (one-half size larger than first pair); cuff over suit.

Check belt unit for proper function.

Back into the power unit when putting it on, with the black hose *up*.

Make sure ON/OFF button is within your reach.

Tuck extra belt length into waistband.

Put on surgical gown, tying only the ties at the side (don't use the inner ties).

Place black tubing on the outside of surgical gown.

Put on 3rd pair of gloves.

Put on 3M hood, ensuring that it covers the ears, with grey headband around head.

Attach black hose to hood.

Turn on blower unit.

Adjust hood; ensure that it hangs over the gown.

Ensure that the system is working.

Check each other's systems and gowns.

Gather equipment needed in the room for the procedure (including 4-6 bags for postprocedure equipment removal).

*Enter the room.*

After the procedure, ensure that equipment to be removed from the room is bagged and tied.

## Exiting the room

Untie each other's waist ties on blue gowns; don't touch the turbo unit belt pack.

Carefully remove first pair of gloves.

Assist each other with removal of the black hose from the turbo unit.

Turn the unit off through the surgical gown.

Remove the black tubing first and place it into a biohazard bag; then remove other people's black tubing.

Remove the protective hood from behind and place it into biohazard bag, ensuring not to disturb goggles or mask.

Remove gown; roll it inward into itself with a gentle rolling technique and discard into biohazard bag.

Remove second pair of gloves (**leave one pair on**).

Undo the belt and battery pack; place it into a transparent biohazard bag and seal it.

Notify the extra person outside that you are ready to leave the room. **Do not touch the door**; the person outside opens the door for you.

Remove one shoe cover in the OR and step onto the decontamination carpet on the floor in the hallway; repeat for other shoe cover.

Remove the 3rd pair of gloves.

You are now outside the designated staff entrance/exit.

## *In the hallway*

Alcohol-rinse your hands.

Put on clean gloves.

Unzip the body suit.

Remove body suit, touching only the outside: start by pulling off the hood. Then, *without* removing your hands from the inside of the sleeves, remove the suit from the shoulders down to the feet. Place it in a biohazard bag.

Remove 2nd pair of shoe covers and place into biohazard bag; step off the mat.

Remove gloves and disinfect your hands, wrists and lower arms.

Put on clean gloves.

Take off goggles.

Take off cap by pulling it front-to-back.

Take off mask by pulling it forward off the face (cut the straps, if scissors are available).

Take off remaining gloves.

Rinse hands.

Put on a new N95 mask.

*Leave the area.*
